# Supplementary material for: Facile synthesis of Pd-based bimetallic nanocrystals and their application as catalysts for methanol oxidation reaction
Source: Royal Society of Chemistry journal article supplement (doi:10.1039/c3nr00912b), 2013-01-01
Supplement: c3nr00912b.pdf [file c3nr00912b.pdf]

## Facile Synthesis of Pd-Based Bimetallic Nanocrystals and Their Application as Catalysts for Methanol Oxidation Reaction

Pinxian Xi<sup>\*a</sup>, Yang Cao<sup>c</sup>, Fengchun Yang<sup>c</sup>, Cai Ma<sup>a</sup>, Fengjuan Chen<sup>a</sup>, Sha Yu<sup>c</sup>, Shuai Wang<sup>a</sup>,  
Zhengzhi Zeng<sup>a</sup> and Xin Zhang<sup>\*b</sup>

<sup>a</sup>Key Laboratory of Nonferrous Metal Chemistry and Resources Utilization of Gansu Province and Colleague of Chemistry and Chemical Engineering, Lanzhou University, Lanzhou 730000, P. R. China.

<sup>b</sup>Institute of Analytical Science/Shanxi Provincial Key Laboratory of Electroanalytical Chemistry, Northwest University, Xi'an, 710069, PR China

<sup>c</sup>Key Laboratory of Synthetic and Natural Functional Molecule Chemistry (Ministry of Education), College of Chemistry and Materials Science, Northwest University, Xi'an 710069, PR China

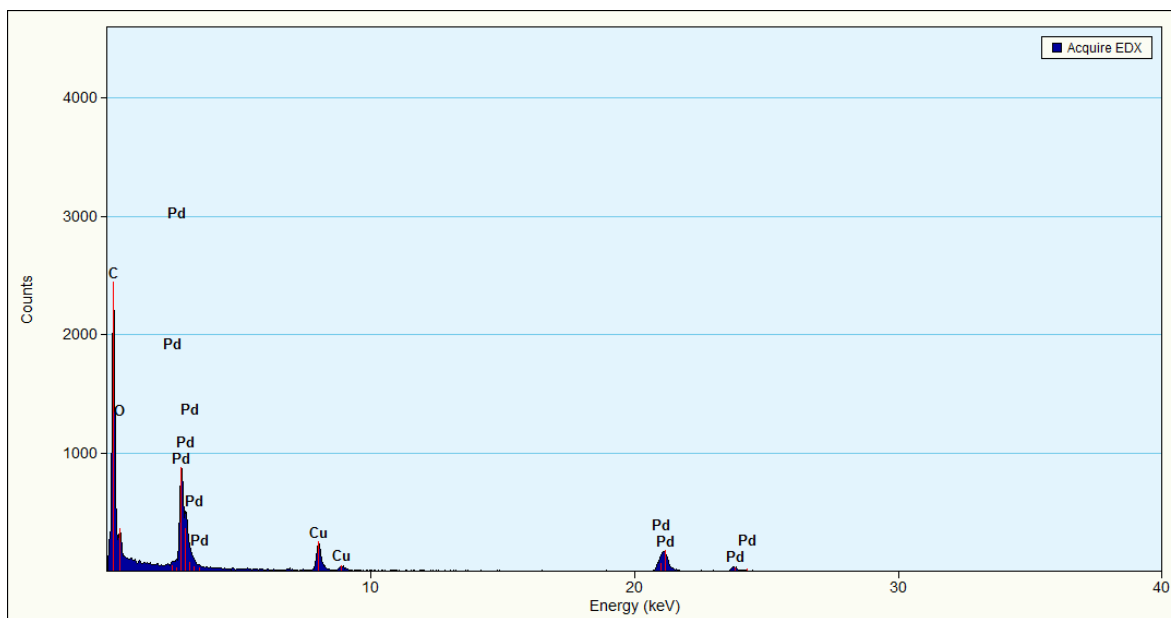

Fig. S1 EDX spectra of CuPd nanocrystal

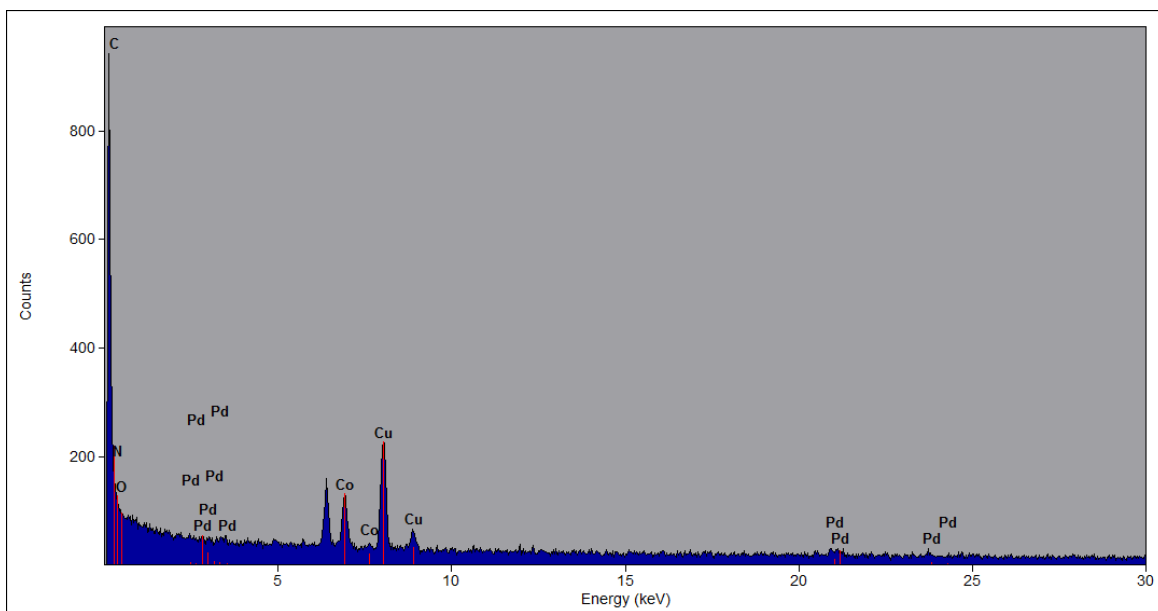

Fig. S2 EDX spectra of CoPd nanocrystal

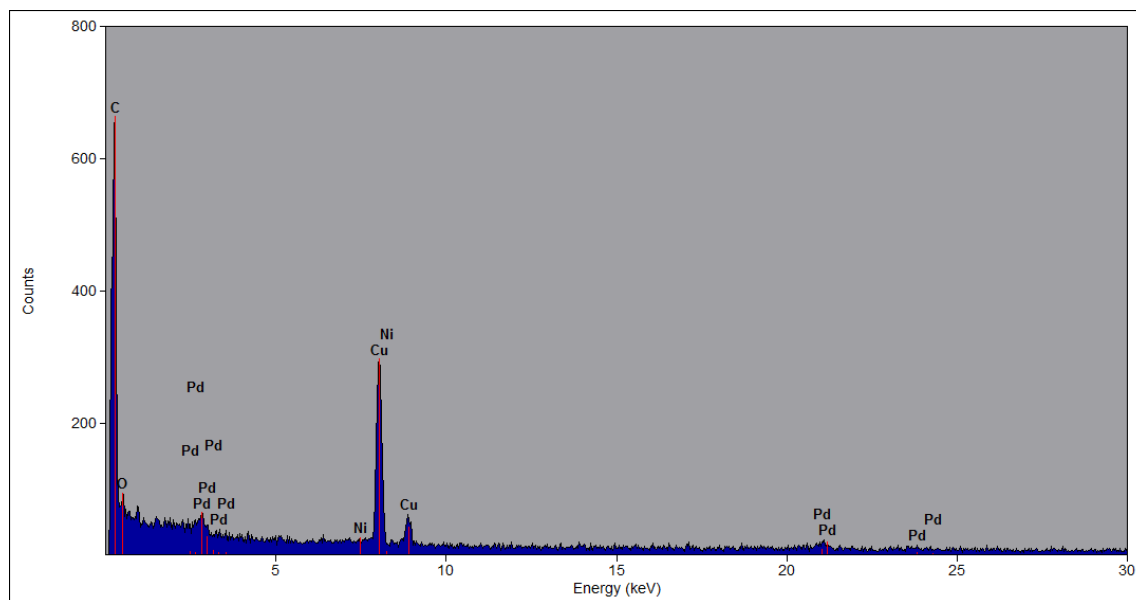

Fig. S3 EDX spectra of NiPd nanocrystal
